# Supplementary material for: Macrophage Migration Inhibitor Factor Upregulates MCP-1 Expression in an Autocrine Manner in Hepatocytes during Acute Mouse Liver Injury
Source: PubMed Central journal article supplement (PMC4897699; doi:10.1038/srep27665), 2016-06-08
Supplement: srep27665-s1.pdf [file srep27665-s1.pdf]

# Macrophage Migration Inhibitor Factor Upregulates MCP-1 Expression in an Autocrine Manner in Hepatocytes during Acute Mouse Liver Injury

Jieshi Xie, Le Yang, Lei Tian, Weiyang Li, Lin Yang and Liying Li\*

## Supplementary information

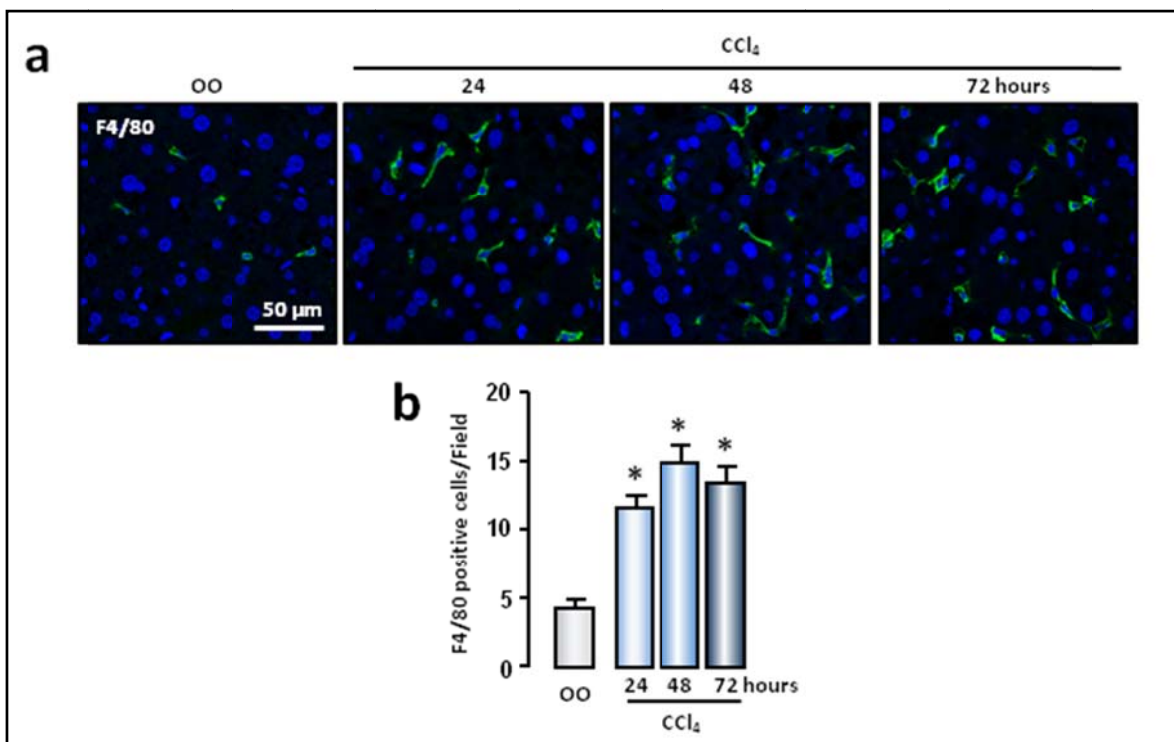

### Supplementary Figure 1. Macrophages infiltration was increased in CCl<sub>4</sub>

**induced liver injury.** (a) Representative images of immunofluorescence by confocal microscopy to track macrophages (F4/80+, green) in the CCl<sub>4</sub>-treated liver, DAPI was used to visualize nuclei (blue). (b) Quantification of macrophages (F4/80+, green) with Image-Pro Plus software. Scale bars, 50 μm. Data are presented as the means ± SEM. \* $P < 0.05$  vs control group (n=6, per group).

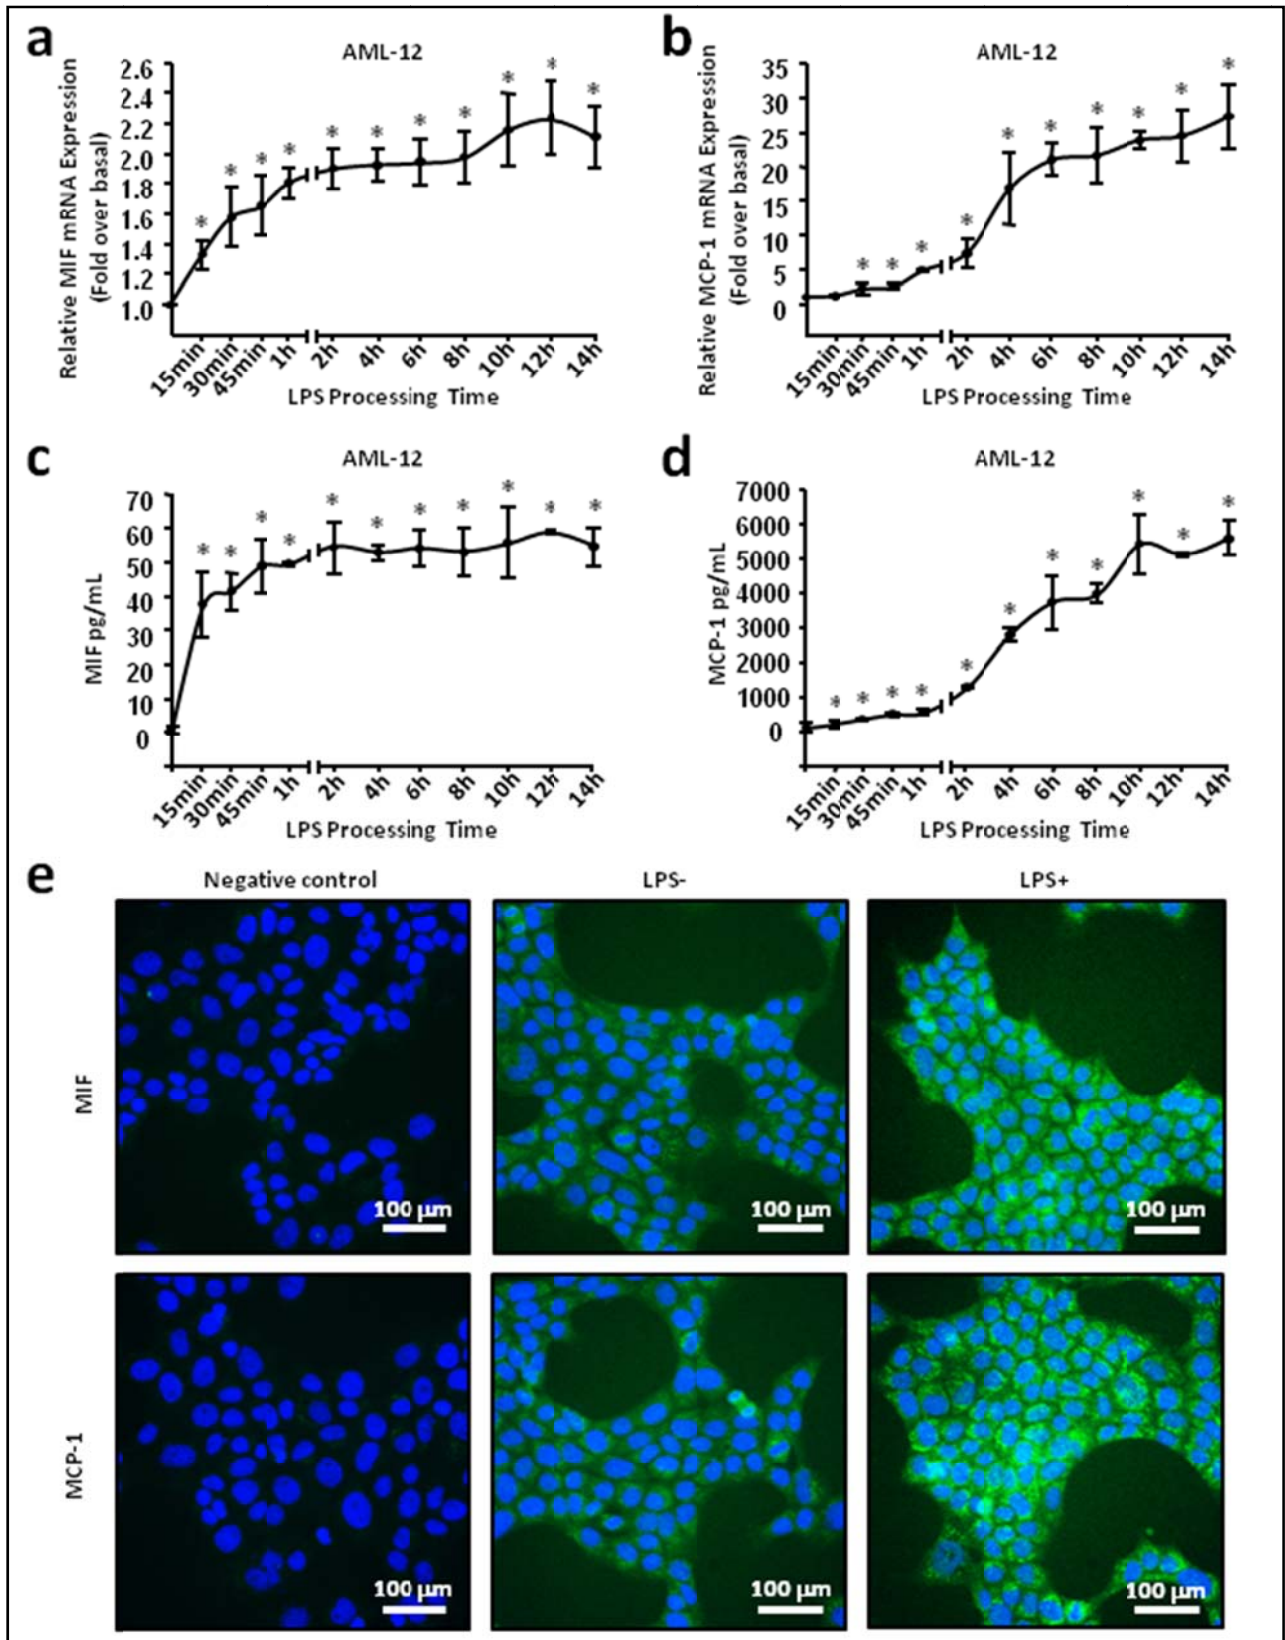

**Supplementary Figure 2.** LPS induced increase of MIF earlier than MCP-1 in AML-12 cells. AML-12 cells were treated with 100 ng/mL LPS and collected at the described time points, the relative mRNA (a, b) expression and protein secretion (c, d) of MIF and MCP-1 were examined by real-time RT-PCR and ELISA. (e) The representative images of immunofluorescence for MIF or MCP-1 (green) in AML-12 cells, as visualized by immunocytochemical analysis. Cells were co-stained with DAPI to identify nuclei (blue). Scale bars, 100  $\mu$ m. All results were confirmed in three independent experiments at least. \*P < 0.05 vs untreated control cells.

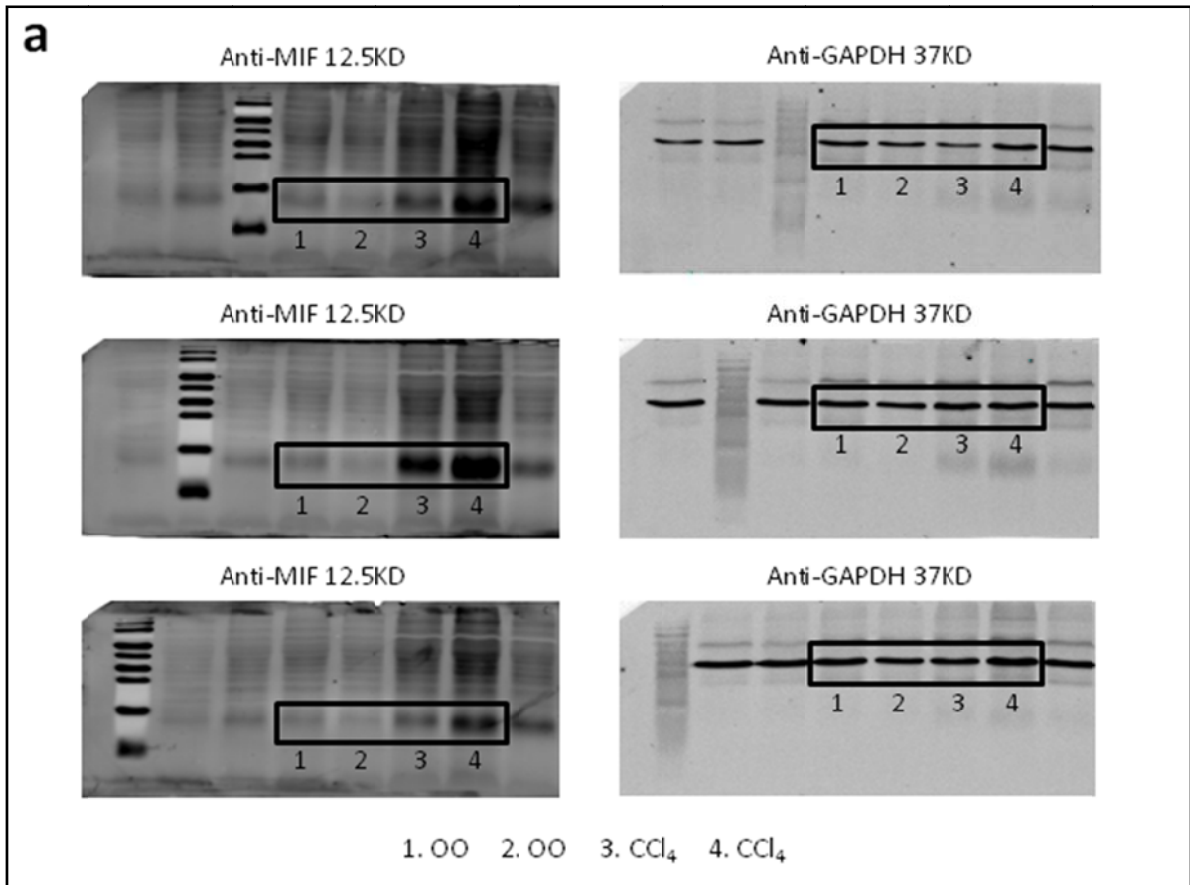

**Supplementary Figure 3. The full-length blots of Figure 1b.**

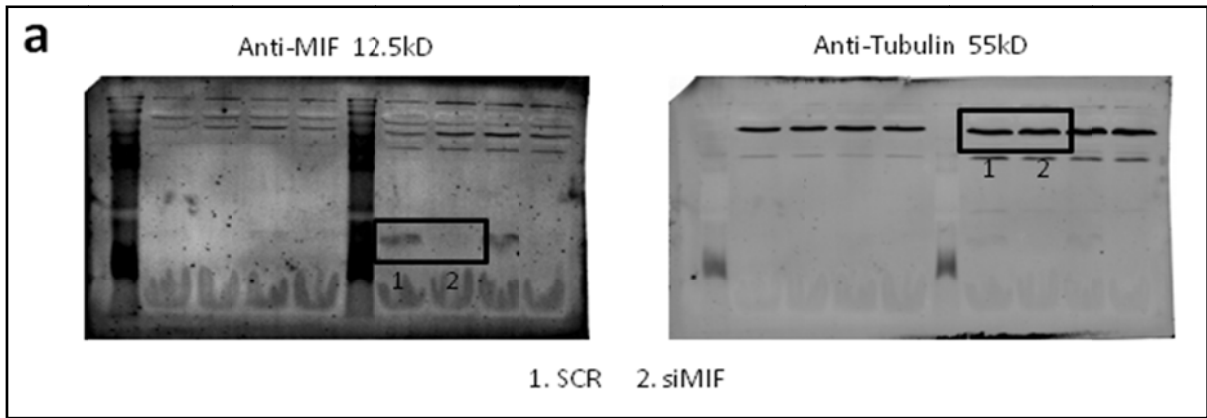

**Supplementary Figure 4. The full-length blots of Figure 3b.**

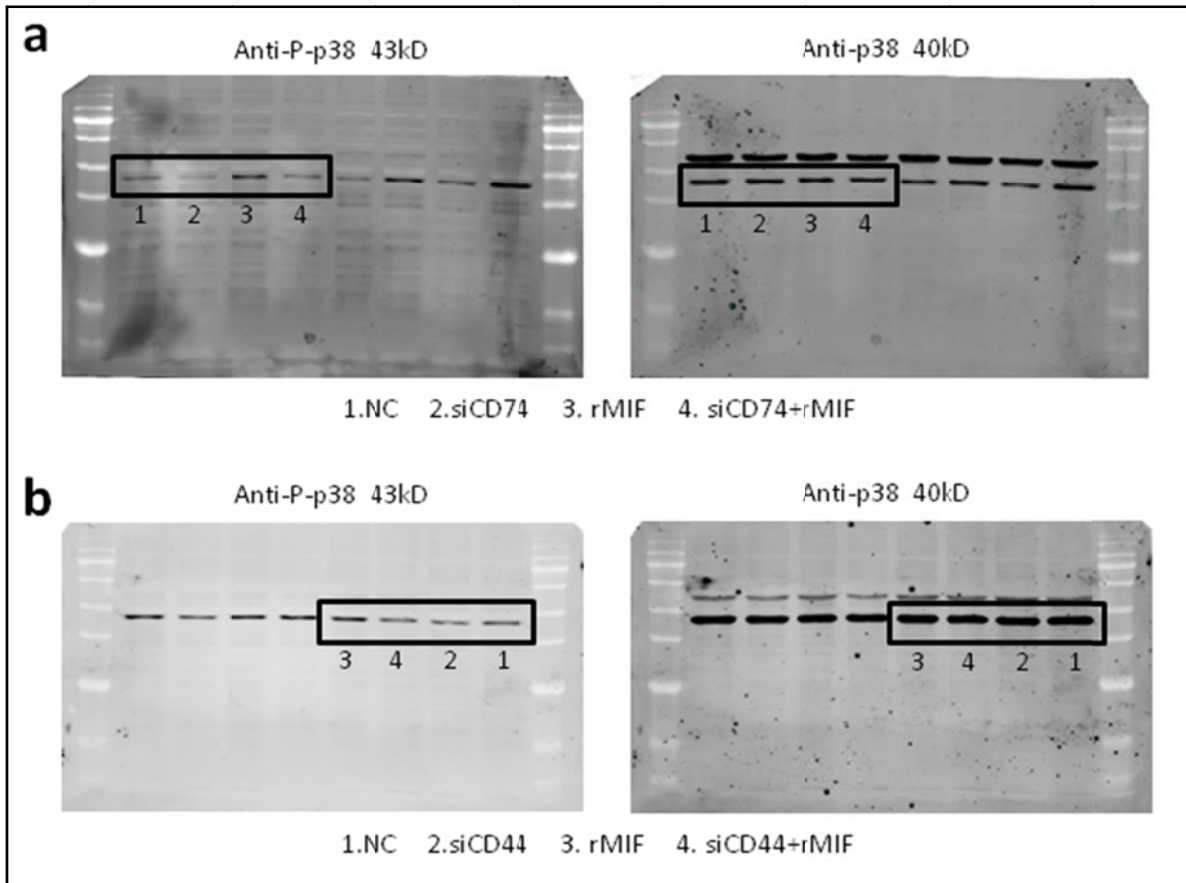

**Supplementary Figure 5. The full-length blots of Figure 5. (a) The full-length blots of Figure 5c. (b) The full-length blots of Figure 5d.**

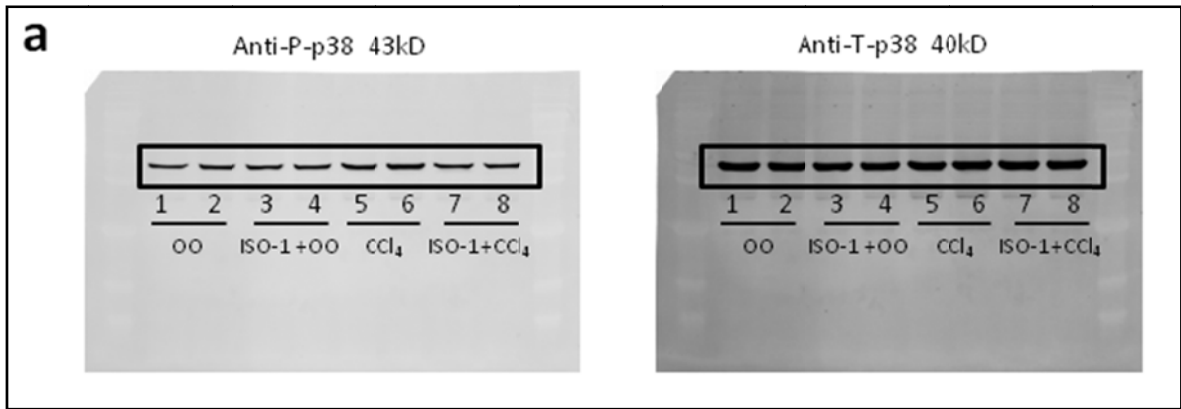

**Supplementary Figure 6. The full-length blots of Figure 6c.**
